# Supplementary material for: Stimulation of intestinal growth with distal ileal infusion of short-chain fatty acid: a reevaluation in a pig model
Source: Royal Society of Chemistry journal article supplement (doi:10.1039/c7ra03730a), 2017-01-01
Supplement: c7ra03730a1.pdf [file c7ra03730a1.pdf]

Table S1 Ingredients and nutrient compositions of basal diet (air dry basis) %

| Ingredient                  | Content | Calculated Composition | Nutrient content |
|-----------------------------|---------|------------------------|------------------|
| Corn                        | 78.20   | DE (MJ/kg)             | 3.40             |
| Soybean meal                | 14.60   | Crude protein          | 15.74            |
| Soybean oil                 | 1.00    | Calcium                | 0.52             |
| Fish meal                   | 4.50    | Total phosphorus       | 0.50             |
| Limestone                   | 0.35    | Available phosphorus   | 0.32             |
| Dicalcium phosphate         | 0.27    | Lys                    | 0.98             |
| Salt                        | 0.25    | Met                    | 0.35             |
| <i>L</i> -Lys-HCl (78%)     | 0.34    | Thr                    | 0.59             |
| <i>DL</i> -Met (99%)        | 0.10    | Trp                    | 0.17             |
| Trp (98%)                   | 0.07    |                        |                  |
| Thr (98.5%)                 | 0.02    |                        |                  |
| Chloride choline            | 0.05    |                        |                  |
| Vitamin premix <sup>1</sup> | 0.05    |                        |                  |
| Mineral premix <sup>2</sup> | 0.20    |                        |                  |
| Total                       | 100.00  |                        |                  |

<sup>1</sup>The premix provides following per kg diet: VA 5512 IU, VD<sub>3</sub> 2250 IU, VE 24 mg, VK<sub>3</sub> 3 mg, VB<sub>2</sub> 6 mg, VB<sub>6</sub> 3 mg, VB<sub>12</sub> 24 µg, folic acid 1.2 mg, nicotinic acid 14 mg, biotin 150 µg, *D*-pantothenic acid 15 mg.

<sup>2</sup>The premix provides following per kg diet: Fe 60 mg, Cu 4 mg, Mn 2 mg, Zn 60 mg, I 0.14 mg, Se 0.2 mg.

Table S2 Primer sequences and annealing temperature of pigs

| Target gene    | Forward primer 5'-3'          | Reverse primer 5'-3'     | Product length | Accession number |
|----------------|-------------------------------|--------------------------|----------------|------------------|
| EGF            | ATCTCAGGAATGGGAGTCAACC        | TCACTGGAGGATGGAATACAGC   | 165            | NM_214020.1      |
| GCG            | ACTCACAGGGCACGTTTACCA         | AGGTCCCTTCAGCATGTCTCT    | 149            | NM_005671883.1   |
| GLP2R          | GACCCTCTCTTGTGTCTTCGTA        | AAGATGACGTCCCTTCGCCAG    | 120            | NM_001246266.1   |
| IGF1           | CTGAGGAGGCTGGAGATGTACT        | CCTGAACTCCCTCTACTTGTGTTC | 137            | NM_001097417.1   |
| IGF1R          | TTCGCCAGATCCTAGGGGAG          | TCCCAGCTTTGATGGTCAGG     | 120            | NM_214172.1      |
| SLC5A1         | GCAACAGCAAAGAGGAGCGTAT        | GCCACAAAACAGGTCATAGGTC   | 137            | NM_001164021.1   |
| SLC2A2         | GACACGTTTTGGGTGTTCCG          | GAGGCTAGCAGATGCCGTAG     | 149            | NM_001097417.1   |
| SLC7A1         | TCTTTGCAGGTCGTTTGGGA          | GGCTGATCACCTGTTGGAGT     | 137            | NM_001012613.1   |
| SLC11A2        | GCAGGTGGTTGACGTCTGTA          | CACGCCCCCTTTGTAGATGT     | 100            | NM_001128440.1   |
| SLC30A1        | TGCTCTGCATGCTGTTACTGA         | TGGAAGGAGTCCGAGAGCAT     | 97             | NM_001139470.1   |
| CLDN1          | ATTCAGGTCTGGCTATCTTAGTTG<br>C | AGGGCCTTGGTGTGGGTAA      | 214            | NM_001244539.1   |
| OCLN           | CAGGTGCACCCTCCAGATTG          | GGACTTTCAAGAGGCCTGGAT    | 110            | NM_001163647.2   |
| TJP1           | CTGAGGGAATTGGGCAGGAA          | TCACCAAAGGACTCAGCAGG     | 105            | XM_013993251.1   |
| MUC1           | GTGCCGCTGCCACAACCTG           | AGCCGGGTACCCAGACCCA      | 141            | XM_001926883.5   |
| MUC2           | GGTCATGCTGGAGCTGGACAGT        | TGCCCTCTCGGGGTCGTAC      | 181            | XM_013989745.1   |
| BCL2           | TGCCTTTGTGGAGCTGTATG          | GCCCGTGGACTTCACTTATG     | 144            | XM_003121700.4   |
| BAX            | AAGCGCATTGGAGATGAACT          | TGCCGTCAGCAAACATTC       | 121            | XM_013998624.1   |
| CASP3          | GGAGAACAATAAAAACCTCCGTGG      | CATCCAAGGATATTCCAGAGTCCA | 101            | NM_214131.1      |
| CCND1          | AGCAGGAGCTAAAGCCGAAC          | TCGTTGAGGAGGTTGGCATC     | 149            | XM_013994006.1   |
| CDKN1A         | AAGCACAACCCTCAACCACT          | TGCAGGTCTGAGAATGCAGG     | 112            | XM_001929558.2   |
| IL8            | AGTGGACCCCACTGTGAAAA          | TACAACCTTCTTCTGCACCCA    | 102            | X61151.1         |
| TNF $\alpha$   | CGTGAAGCTGAAAGACAACCAG        | GATGGTGTGAGTGAGGAAAACG   | 121            | NM_214022.1      |
| IL1 $\beta$    | ACGTGCAATGATGACTTTGTCTG       | AGAGCCTTCAGCATGTGTGG     | 113            | NM_214055.1      |
| IL10           | GACGTAATGCCGAAGGCAGA          | TGCTCTTGTTCACAGGGC       | 133            | NM_214041.1      |
| FFAR2          | TCATGGGTTTCGGCTTCTACAG        | GTACTGAACGATGAACACGACG   | 197            | EU122439.1       |
| FFAR3          | ACTACTTCTCATCCTCGGGGTT        | CTCCACTTCGCTCTTCTTCAGT   | 119            | JX566879.1       |
| $\beta$ -actin | TCTGGCACACACCTTCT             | TGATCTGGGTCATCTTCTCAC    | 114            | DQ178122         |

Table S3 Primes and probes for real time PCR of bacteria

| Items                   | Primer/probe name and sequence(5'-3')           | Product length/bp |
|-------------------------|-------------------------------------------------|-------------------|
| <i>Escherichia coli</i> | DC-F,CATGCCGCGTGTATGAAGAA                       | 96                |
|                         | DC-R,CGGGTAACGTCAATGAGCAAA                      |                   |
|                         | DC-P,(FMA)AGGTATTAACCTTACTCCCTTCCTC(BHQ-1)      |                   |
| <i>Lactobacillus</i>    | RS-F,GAGGCAGCAGTAGGGAATCTTC                     | 126               |
|                         | RS-R,CAACAGTTACTCTGACACCCGTTCTTC                |                   |
|                         | RS-P,(FMA)AAGAAGGGTTTCGGCTCGTAAAACTCTGTT(BHQ-1) |                   |
| <i>Bifidobacterium</i>  | SQ-F,CGCGTCCGGTGTGAAAG                          | 121               |
|                         | SQ-R,CTTCCCGATATCTACACATTCCA                    |                   |
|                         | SQ-P, (FMA) ATTCCACCGTTACACCGGGAA(BHQ-1)        |                   |
| <i>Bacillus</i>         | YB-F,GCAACGAGCGCAACCCTTGA                       | 92                |
|                         | YB-R,TCATCCCCACCTTCCTCCGGT                      |                   |
|                         | YB-P, (FMA)CGGTTTGTACCGGCAGTCACCT(BHQ-1)        |                   |
| Total bacteria          | Eub338F,ACTCCTACGGGAGGCAGCAG                    | 200               |
|                         | Eub518R,ATTACCGCGGCTGCTGG                       |                   |
